# Supplementary material
Source: PubMed Central journal article supplement (PMC9009136)
Supplement: NIHMS1769582-supplement-Supporting_Info.pdf [file NIHMS1769582-supplement-Supporting_Info.pdf]

# Supporting Information for

## A Subset of Fluorophores is Responsible for Radiation-Brightening in Viromimetic Particles

Arathi Anil Sushma,<sup>†</sup> Bingqing Zhao,<sup>†</sup> Irina B. Tsvetkova,<sup>†</sup> Carolina  
Pérez-Segura,<sup>‡</sup> Jodi Hadden-Perilla,<sup>‡</sup> James P. Reilly,<sup>†</sup> and Bogdan Dragnea<sup>\*,†</sup>

<sup>†</sup>*Department of Chemistry, Indiana University, Bloomington, IN 47405, U.S.*

<sup>‡</sup>*Department of Chemistry and Biochemistry, University of Delaware, Newark, DE 19716,  
U.S.*

E-mail: dragnea@indiana.edu

Phone: +1 (812) 856 0087

## Virus Modification and Characterization

The efficiency of labelling in the BMV-OG conjugates was estimated with the help of UV-Visible absorption spectroscopy.<sup>1</sup> The average number of chromophores were calculated using a molar extinction coefficient value of  $\varepsilon = 33,641 \text{ cm}^{-1}\text{M}^{-1}$  for Oregon green NHS ester at 496 nm in buffer at pH 4.6.

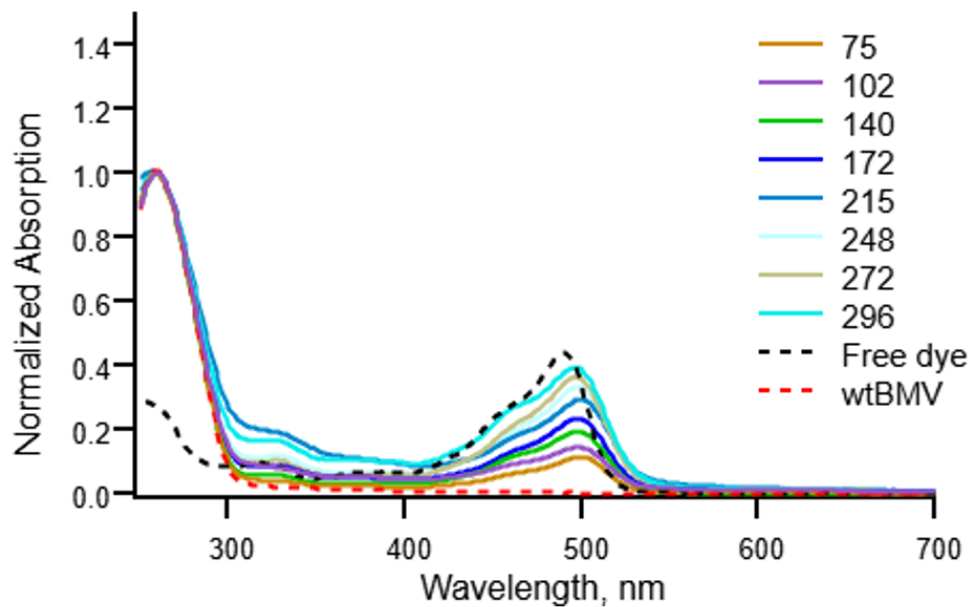

Figure S1: Steady state UV-Visible absorption spectra of BMV-OGs normalized at 260 nm. The legends show varying number of chromophores per virus in average. The absorbance spectra of free dye and wtBMV is also depicted for comparison.

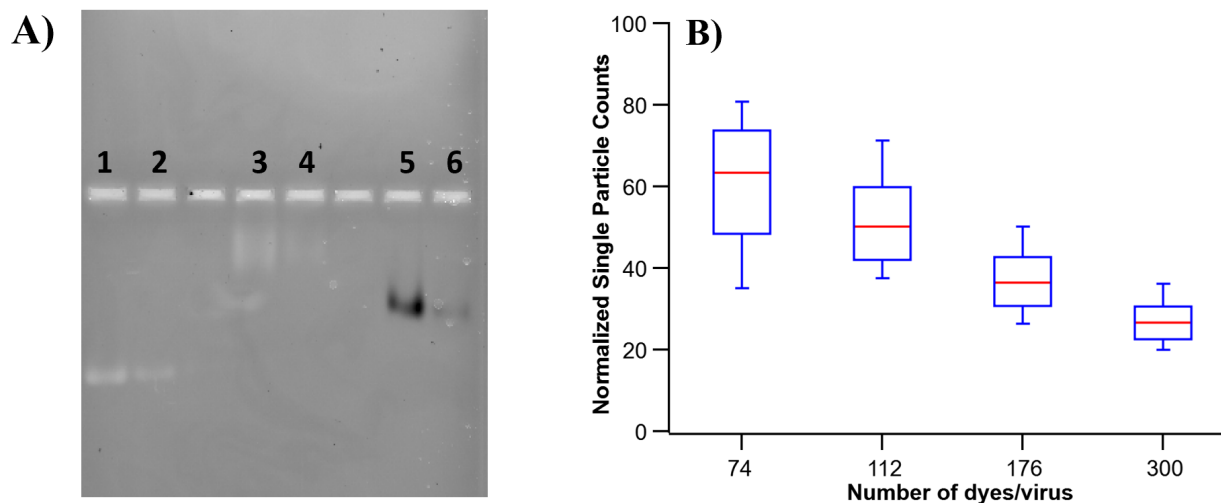

Figure S2: A) Coomassie stained native agarose gel for wtBMV ( Lane 1 and 2- 0.5 and 0.25 mg/mL, respectively), BMV capsid protein (Lane 3 and 4 – 0.5 and 0.25 mg/mL) and BMV-OG with 220 dyes/virus(Lane 5 and 6 -0.3 and 0.15 mg/mL). There is a noticeable difference in electrophoretic mobility between wtBMV and OG-BMV which is interpreted as due to a difference in surface charge. B) Box and whiskers plot representing the normalized fluorescence counts to incident laser power from TIRF microscopy for BMV-OGs with 74, 112, 176 and 300 dyes/virus. The fluorescence intensity is quenched at higher dye numbers, consistent with the steady state fluorescence results from Tsvetkova *et al.*<sup>1</sup>

## Enzymatic digestion and LC-MS/MS results

The enzymes employed for proteolytic digestion of BMV capsid protein<sup>2</sup> are trypsin, chymotrypsin and proteinase K(PK). The tryptic and chymotryptic cleavage sites are shown in Figure. S3 and S4. PK can digest proteins adjacent to the carboxyl group of aliphatic and aromatic amino acids.

MSTSGTG**K**M**T**R**A**Q**R**R**A**A**R**R**N**R**W**T**A**R**V**Q**P**V**I**V**E**P**L**A**A**G**Q**G**K**A**I**K**A**I**A**G**Y**S**I**S**K****W**E**A**S**S**  
S**D**A**I**T**A**K**A**T**N**A**M**S**I**T**L**P**H**E**L**S**S**E**K**N**K**E**L**K**V**G**R**V**L**L**W**L**G**L**L**P**S**V**A**G**R**I**K**A**C**V**A**E**K**Q**A**Q**A**  
E**A**A**F**Q**V**A**L**A**V**A**D**S**S**K**E**V**V**A**A**M**Y**T**D**A**F**R**G**A**T**L**G**D**L**L**N**L**Q**I**Y**L**Y**A**S**E**A**V**P**A**K**A**V**V**V**H**L**E  
V**E**H**V**R**P**T**F**D**D**F**F**T**P**V**Y**R

Figure S3: Tryptic cleavage sites (labelled in red) for BMV capsid protein

MSTSGTG**K**M**T**R**A**Q**R**R**A**A**R**R**N**R**W**T**A**R**V**Q**P**V**I**V**E**P**L**A**A**G**Q**G**K**A**I**K**A**I**A**G**Y**S**I**S**K****W**E**A**S**S**  
D**A**I**T**A**K**A**T**N**A**M**S**I**T**L**P**H**E**L**S**S**E**K**N**K**E**L**K**V**G**R**V**L**L****W**L**G**L**L**P**S**V**A**G**R**I**K**A**C**V**A**E**K**Q**A**Q**A**E  
A**A**F**Q**V**A**L**A**V**A**D**S**S**K**E**V**V**A**A**M**Y**T**D**A**F**R**G**A**T**L**G**D**L**L**N**L**Q**I**Y**L**Y**A**S**E**A**V**P**A**K**A**V**V**V**H**L**E**  
V**E**H**V**R**P**T**F**D**D**F**F**T**P**V**Y**R

Figure S4: Chymotryptic cleavage sites (labelled in red) for BMV capsid protein

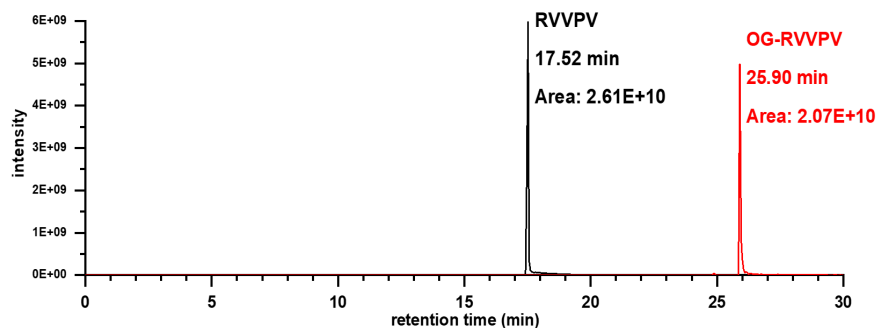

Figure S5: Extracted ion chromatogram of peptide mixture containing equal amount of RVVPV and OG488 labelled peptide. The OG488 label prolongs the peptide retention time. The peak area of labelled peptide is 20% smaller than the one of unlabeled peptide, indicating the OG488 label may change the extent of peptide ionization.

## Limited Proteolysis of BMV-OGs

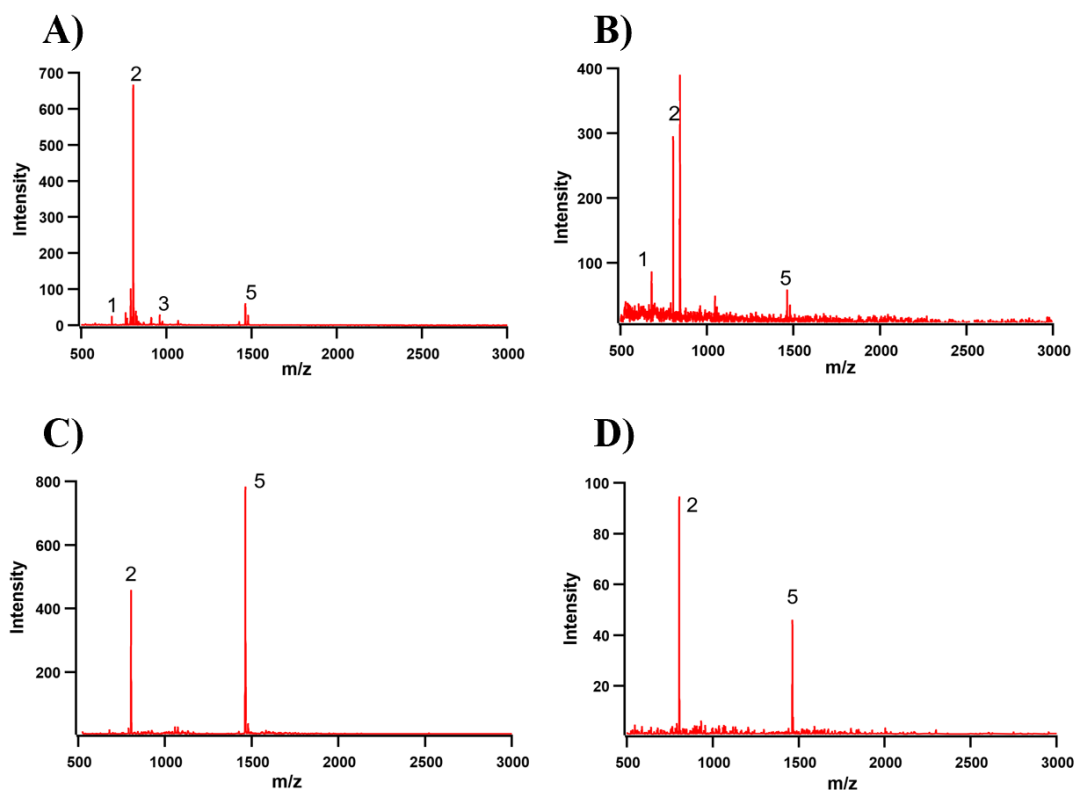

Figure S6: MALDI-TOF analysis of peptides released from BMV-OG samples after trypsin treatment for short time intervals: A) 56, B) 132, C) 231, D) 292 dyes/virus respectively. The masses and the identity of labelled ions can be seen in Table 4 of the main document

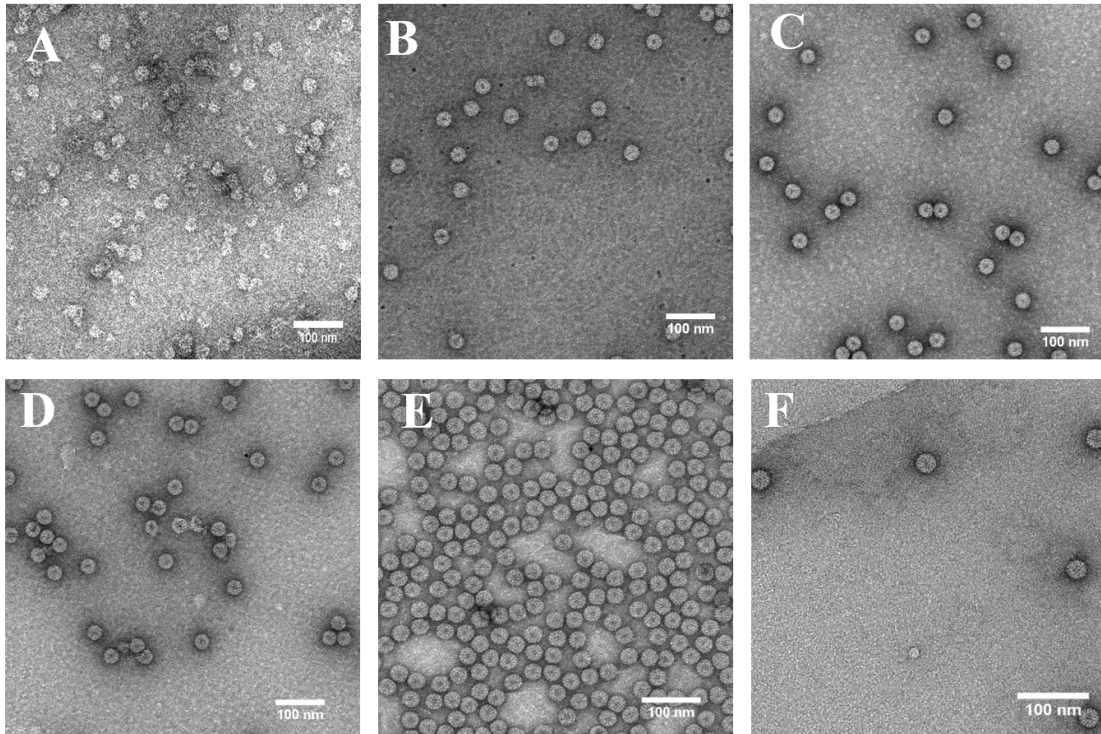

Figure S7: TEM image of particles after digestion: A) wtBMV, BMV-OGs with different dye numbers B) 56, C) 132, D) 231, E) 264, F) 292

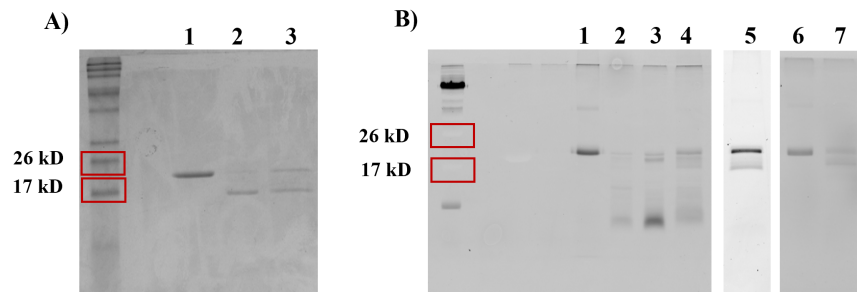

Figure S8: Coomassie-stained SDS-PAGE gel of A) wtBMV: Lane 1- Untreated; Lane 2 and 3- Trypsinated BMV for 5 and 10 mins respectively, B) BMV-OGs: Lane 1 and 6- Untreated BMV-OGs; Lane 2,3,4,5,7 - Trypsinated BMV-OGs with 56, 132, 231, 264 and 317 dyes numbers. Prestained ladder is also shown at the leftmost end for each figure.

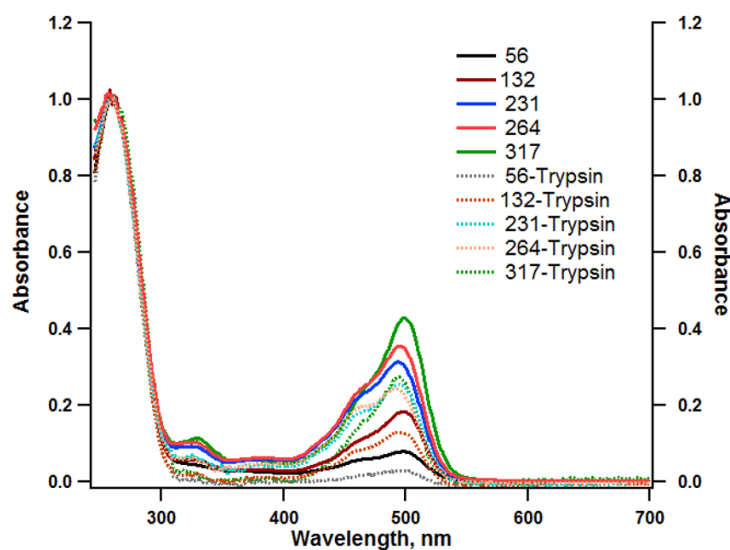

Figure S9: UV-Vis absorption spectra of BMV-OG before and after proteolytic digestion. The absorbance value at 500 nm (OG emission peak) dropped after the trypsin treatment (depicted by dashed lines). Spectra are normalized at 260 nm - the peak of protein absorption band.

## cBMV mutant Modification and Characterization

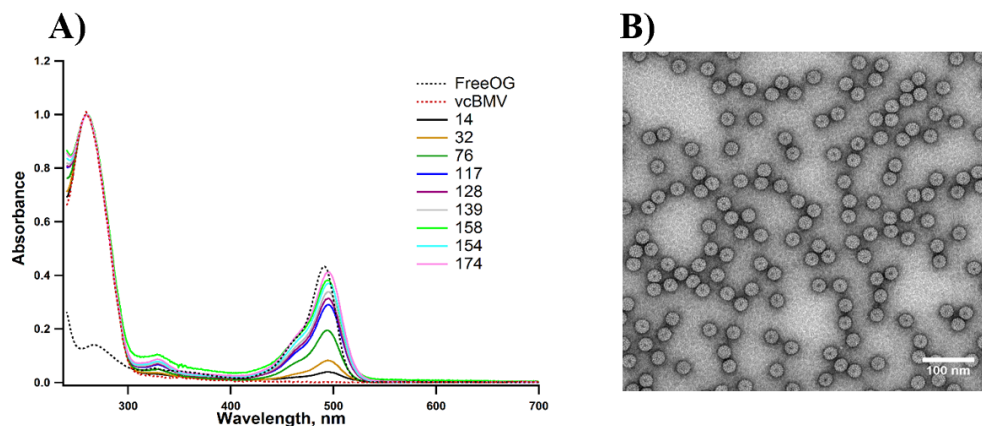

Figure S10: UV-Visible absorption spectra of cBMV-OG normalized at 260 nm. The average number of chromophores were calculated using a molar extinction coefficient value of  $\epsilon = 65,000 \text{ cm}^{-1}\text{M}^{-1}$  for Oregon green maleimide at 496 nm, in buffer at pH 6. The legend shows the average number of chromophores per virus. B) TEM of cBMV-OG particles.

Table S1: HPLC gradient used for peptide LC-MS/MS

| Time (mm:ss) | Flow Rate (nL/min) | Mobile Phase A (%) | Mobile Phase B (%) |
|--------------|--------------------|--------------------|--------------------|
| 00:00        | 300                | 98                 | 2                  |
| 00:30        | 300                | 93                 | 7                  |
| 24:30        | 300                | 62                 | 38                 |
| 25:00        | 300                | 0                  | 100                |
| 30:00        | 300                | 0                  | 100                |

Mobile phase A: 0.1% formic acid + 99.9% water

Mobile phase B: 0.1% formic acid + 19.9% water + 80% acetonitrile



Table S2: Tryptic peptides, retention time(RT) and their corresponding masses- wtBMV

| Residue | Sequence                                     | RT, min                    | Mass, Da           |
|---------|----------------------------------------------|----------------------------|--------------------|
| 1-11    | MSTSGTGKMTR                                  | 8.35-8.68                  | 1068.52            |
| 1-8     | MSTSGTGK                                     | 7.33-8.40                  | 1358.60            |
| 27-41   | VQPVIVEPLAAGQGK                              | 17.81-18.91                | 1506.87            |
| 27-64   | VQPVIVEPLAAGQGKAIKAIAGYSISKWEASSDAITAK       | 25.08-25.11                | 3871.14            |
| 42-64   | AIKAIAGYSISKWEASSDAITAK                      | 19.06-19.15                | 2384.29            |
| 45-53   | AIAGYSISK                                    | 12.21-14.9                 | 910.51             |
| 45-64   | AIAGYSISKWEASSDAITAK                         | 18.91-18.96                | 2071.07            |
| 27-44   | VQPVIVEPLAAGQGKAIK                           | 17.11-17.60                | 1820.09            |
| 54-64   | WEASSDAITAK                                  | 13.80-15.63                | 1179.57            |
| 65-81   | ATNAMSITLPHELSSEK<br>ATNAM(oxid)SITLPHELSSEK | 17.03-17.81<br>15.28-15.93 | 1829.91<br>1846.92 |
| 65-83   | ATNAMSITLPHELSSEKNK                          | 15.23-15.51                | 2074.07            |
| 65-86   | ATNAMSITLPHELSSEKNKELK                       | 15.05-15.25                | 2445.3             |
| 82-103  | NKELKVGRVLLWLGLLPSVAGR                       | 26.75-27.11                | 2420.48            |
| 84-103  | ELKVGRVLLWLGLLPSVAGR                         | 29.70-29.96                | 2178.35            |
| 87-103  | VGRVLLWLGLLPSVAGR                            | 29.15-29.43                | 1808.12            |
| 87-111  | VGRVLLWLGLLPSVAGRIKACVAEK                    | 17.81-17.85                | 2654.12            |
| 104-111 | IKACVAEK                                     | 9.0-9.05                   | 862.49             |
| 112-130 | QAQAEAAFQVALAVADSSK                          | 26.60-29.36                | 1905.97            |
| 131-142 | EVVAAMYTDAFR                                 | 21.75-27.41                | 1373.66            |
| 166-189 | AVVHLEVEHVRPTFDDFFTPVYR                      | 23.30-28.53                | 2873.48            |

Table S3: Chymotryptic peptides, retention time and their corresponding masses- wtBMV.

| Residue | Sequence                   | RT, min     | Mass, Da |
|---------|----------------------------|-------------|----------|
| 24-35   | TARVQPVIVEPL               | 18.38-18.53 | 1321.78  |
| 36-49   | AAGQGKAIKAIAGY             | 12.70-13.06 | 1319.75  |
| 55-77   | EASSDAITAKATNAMSITLPHEL    | 22.15-23.5  | 2374.18  |
| 86-92   | KVGRVLL                    | 10.58-10.83 | 785.54   |
| 120-137 | QVALAVADSSKEVVAAMY         | 23.43-23.83 | 1852.96  |
| 124-137 | AVADSSKEVVAAMY             | 17.86-19.61 | 1441.71  |
|         | AVADSSKEVVAAM(Oxid)Y       | 14.86-14.93 | 1457.71  |
| 138-146 | TDAFRGATL                  | 15.58-15.66 | 952.49   |
| 138-150 | TDAFRGATLGDLL              | 24.75-25.36 | 1350.71  |
| 142-150 | RGATLGDLL                  | 19.91-20.58 | 916.53   |
| 142-152 | RGATLGDLLNL                | 25.53-25.75 | 1143.66  |
| 147-155 | GDLLNLQIY                  | 28.83-29.03 | 1049.58  |
| 156-180 | LYASEAVPAKAVVHLEVEHVRPTF   | 20.05-20.23 | 2765.53  |
| 156-171 | LYASEAVPAKAVVHHL           | 18.23-18.26 | 1667.96  |
| 158-180 | ASEAVPAKAVVHLEVEHVRPTF     | 17.51-17.86 | 2487.37  |
| 158-183 | ASEAVPAKAVVHLEVEHVRPTFDDF  | 20.63-22.2  | 2864.50  |
| 158-184 | ASEAVPAKAVVHLEVEHVRPTFDDFF | 23.11-23.73 | 3011.56  |
| 158-171 | ASEAVPAKAVVHHL             | 15.45-15.56 | 1392.82  |

Table S4: Proteinase K peptides, retention time and their corresponding masses- wtBMV.

| Residue | Sequence                        | RT, min     | Mass, Da |
|---------|---------------------------------|-------------|----------|
| 4-11    | SGTGKMTR                        | 15.88-15.96 | 883.43   |
| 24-35   | TARVQPVIVEPL                    | 18.61-18.81 | 1322.79  |
| 26-35   | RVQPVIVEPL                      | 18.06-19.93 | 1150.70  |
| 27-35   | VQPVIVEPL                       | 22.95-24.65 | 994.60   |
| 63-83   | AKATNAMSITLPHELSSEKNK           | 8.95-9.61   | 2277.17  |
| 68-77   | AMSITLPHEL                      | 21.33-21.4  | 1112.58  |
| 69-80   | MSITLPHELSSE                    | 20.36-20.67 | 1344.65  |
| 69-77   | M(oxid)SITLPHEL                 | 18.46-18.66 | 1056.54  |
| 70-85   | SITLPHELSSEKNKEL                | 15.03-15.13 | 1826.98  |
| 71-88   | ITLPHELSSEKNKELKVG              | 14.25-14.88 | 2025.14  |
| 92-105  | LWLGLLPSVAGRIK                  | 24.68-24.88 | 1524.96  |
| 97-111  | LPSVAGRIKACVAEK                 | 20.61-20.65 | 1552.72  |
| 112-130 | QAQAEAAFQVALAVADSSK             | 24.63-29.86 | 1905.98  |
| 113-130 | AQAEAAFQVALAVADSSK              | 25.43-25.66 | 1778.92  |
| 120-137 | QVALAVADSSKEVVAAMY              | 23.26-23.66 | 1852.96  |
| 121-137 | VALAVADSSKEVVAAMY               | 22.43-22.70 | 1724.90  |
| 122-130 | ALAVADSSK                       | 26.21-26.43 | 861.46   |
| 123-130 | LAVADSSK                        | 26.3-26.65  | 790.43   |
| 125-130 | VADSSK                          | 26.36-26.68 | 606.30   |
| 158-184 | ASEAVPAKAVVVHLEVEHVRPTFDDFF     | 23.13-23.36 | 3011.56  |
| 158-188 | ASEAVPAKAVVVHLEVEHVRPTFDDFFTPVY | 24.38-24.81 | 3472.80  |
| 165-184 | KAVVVHLEVEHVRPTFDDFF            | 21.28-21.56 | 2385.24  |

Table S5: Peptides modified with OG dye generated from eznzymes A) Trypsin, B) Chymotrypsin

A)

| Residue | Sequence                           | RT, min     | Mass, Da |
|---------|------------------------------------|-------------|----------|
| 1-11    | MSTSGTGKMTR                        | 25.33-26.28 | 1462.50  |
| 27-44   | VQPVIVEPLAAGQGKAIAIK               | 27.35-27.58 | 2213.12  |
| 42-53   | AIKAIAGYSISK                       | 26.05-29.73 | 1616.75  |
| 54-81   | WEASSDAITAKATNAMSITLPHELSSEK       | 28.78-30.00 | 3384.51  |
|         | WEASSDAITAKATNAM(oxid)SITLPHELSSEK | 27.78-28.65 | 3400.50  |
| 65-83   | ATNAMSITLPHELSSEKNK                | 24.36-24.41 | 2467.09  |
| 82-89   | NKELKVGR                           | 18.08-18.41 | 1339.61  |
| 84-89   | ELKVGR                             | 22.65-22.81 | 1096.46  |
| 104-111 | IKACVAEK                           | 25.81-25.87 | 1256.52  |

B)

| Residue | Sequence                  | RT, min     | Mass, Da |
|---------|---------------------------|-------------|----------|
| 24-49   | TARVQPVIVEPLAAGQGKAIAIAGY | 28.35-28.75 | 3017.56  |
|         | TARVQPVIVEPLAAGQGKAIAIAGY | 28.28-28.60 | 3018.57  |
| 36-49   | AAGQGKAIAIAGY             | 25.41-27.06 | 1713.78  |
|         | AAGQGKAIAIAGY             | 26.05-27.11 | 1714.79  |
| 86-91   | KVGRVL                    | 23.06-25.81 | 1066.49  |
| 157-171 | YASEAVPAKAVVVHL           | 29.88-29.93 | 1948.91  |
| 158-180 | ASEAVPAKAVVHLEVEHVRPTF    | 27.51-27.66 | 2881.40  |
| 158-183 | ASEAVPAKAVVHLEVEHVRPTFDDF | 29.26-29.60 | 3259.53  |
| 158-171 | ASEAVPAKAVVVHL            | 28.96-29.68 | 1785.84  |

Table S6: Peptides modified with OG dye generated from Proteinase K enzyme

| Residue | Sequence                                                 | RT, min     | Mass, Da |
|---------|----------------------------------------------------------|-------------|----------|
| 24-44   | TARVQPVIVEPLAAGQGKAIK                                    | 24.25-24.35 | 2542.31  |
| 24-49   | TARVQPVIVEPLAAGQGKAIKAIAGY<br>TARVQPVIVEPLAAGQGKAIKAIAGY | 28.46-28.61 | 3017.55  |
| 36-49   | AAGQGKAIKAIAGY                                           | 25.81-26.38 | 1713.78  |
| 158-175 | ASEAVPAKAVVVHLEVEH                                       | 27.53-27.66 | 2281.06  |
| 158-171 | ASEAVPAKAVVVHL                                           | 29.05-29.3  | 1785.84  |
| 161-170 | AVPAKAVVVH                                               | 24.73-24.78 | 1385.64  |
| 165-189 | KAVVVHLEVEHVRPTFDDFFTPVYR                                | 27.63-27.93 | 3397.62  |

Table S7: Tryptic peptides modified with SMTA at pH6

| Residue | Sequence                                                                         | RT, min                | Mass, Da         |
|---------|----------------------------------------------------------------------------------|------------------------|------------------|
| 1-11    | MSTSGTGKMTR                                                                      | 9.75-14.28             | 1109.5           |
| 27-44   | VQPVIVEPLAAGQGKAIK                                                               | 18.9-22.08             | 1861.10          |
| 27-64   | VQPVIVEPLAAGQGKAIKAIAGYSISKWEASSDAITAK<br>VQPVIVEPLAAGQGKAIKAIAGYSISKWEASSDAITAK | 29.43-29.75            | 3912.20          |
| 42-64   | AIKAIAGYSISKWEASSDAITAK                                                          | 23.0-23.20             | 2425.30          |
| 42-53   | AIKAIAGYSISK                                                                     | 16.86-29.18            | 1263.80          |
| 45-64   | AIAGYSISKWEASSDAITAK                                                             | 22.93-23.28            | 2112.10          |
| 54-81   | WEASSDAITAKATNAM(oxid)SITLPHLSSEK                                                | 22.08-22.48            | 3048.50          |
| 65-83   | ATNAMSITLPHLSSEKNK                                                               | 17.68-17.86            | 2113.10          |
| 82-89   | NKELKVGR<br>NKELKVGR                                                             | 8.06-8.81<br>8.95-9.11 | 985.60<br>985.60 |
| 84-89   | ELKVGR                                                                           | 8.36-8.71              | 742.46           |
| 104-111 | IKACVAEK                                                                         | 10.43-10.65            | 903.52           |

Table S8: Chymotryptic peptides modified with SMTA at pH6

| Residue | Sequence                   | RT, min     | Mass, Da |
|---------|----------------------------|-------------|----------|
| 86-91   | KVGRVL                     | 9.25-9.35   | 713.49   |
| 124-137 | AVADSSKEVVAAMY             | 21.33-22.78 | 1482.739 |
|         | AVADSSKEVVAAM(Oxid)Y       | 16.88-17.03 | 1498.733 |
| 158-183 | ASEAVPAKAVVVHLEVEHVRPTFDDF | 24.51-24.81 | 2906.53  |

Table S9: Tryptic peptides modified with SMTA at pH8

| Residue | Sequence                              | RT, min     | Mass, Da |
|---------|---------------------------------------|-------------|----------|
| 1-11    | MSTSGTGKMTR                           | 9.01-17.15  | 1068.50  |
| 27-44   | VQPVIVEPLAAGQGKAIK                    | 18.9-22.08  | 1861.10  |
| 42-53   | AIKAIAGYSISK                          | 16.41-16.76 | 1263.80  |
| 45-81   | AIAGYSISKWEASSDAITAKATNAMSITLPHELSSEK | 28.71-29.18 | 3924.00  |
|         | AIAGYSISKWEASSDAITAKATNAMSITLPHELSSEK |             |          |
| 45-64   | AIAGYSISKWEASSDAITAK                  | 22.93-23.28 | 2112.10  |
| 54-81   | WEASSDAITAKATNAM(oxid)SITLPHELSSEK    | 22.08-22.48 | 3048.50  |
| 54-64   | WEASSDAITAK                           | 16.6-16.75  | 1220.60  |
| 65-83   | ATNAMSITLPHELSSEKNK                   | 17.68-17.86 | 2113.10  |
| 84-89   | ELKVGR                                | 8.36-8.71   | 742.46   |
| 104-111 | IKACVAEK                              | 10.43-10.65 | 903.52   |

Table S10: Chymotryptic peptides modified with SMTA at pH8

| Residue | Sequence                    | RT, min     | Mass, Da |
|---------|-----------------------------|-------------|----------|
| 86-91   | KVGRVL                      | 9.25-9.35   | 713.49   |
| 124-137 | AVADSSKEVVAAMY              | 21.33-22.78 | 1482.73  |
|         | AVADSSKEVVAAM(Oxid)Y        | 16.88-17.03 | 1498.73  |
| 158-183 | ASEAVPAKAVVVHLEVEHVRPTFDDF  | 24.51-24.81 | 2906.53  |
| 158-180 | ASEAVPAKAVVVHLEVEHVRPTF     | 21.83-22.06 | 2529.40  |
| 158-184 | ASEAVPAKAVVVHLEVEHVRPTFDDFF | 27.58-28.25 | 3052.59  |

## Computational Section Results

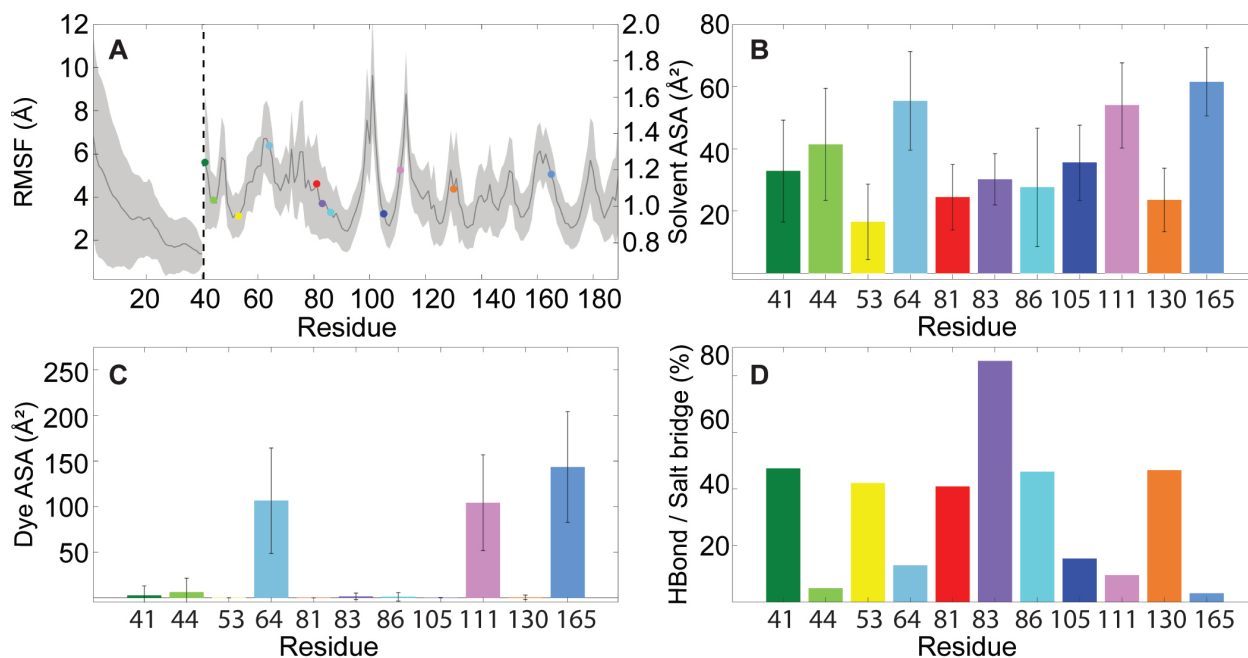

Figure S11: MD simulation results for A chains. (a) Average  $C\alpha$  RMSF over sixty copies of chain A. Axis shown on the left for highly flexible residues 1 to 39, and on the right for remaining residues. Lysines are highlighted according to the color scheme used in Fig. 2. (b) Average solvent accessible surface area for each lysine, calculated with a probe radius of 1.4 Å. (c) Average dye accessible surface area for each lysine, calculated with a probe radius of 5.0 Å. (d) Percentage of trajectory frames in which each lysine was involved in hydrogen bonds and/or salt bridges. Averages were calculated over 4.5 microseconds of cumulative simulation sampling. Error bars represent standard deviation.



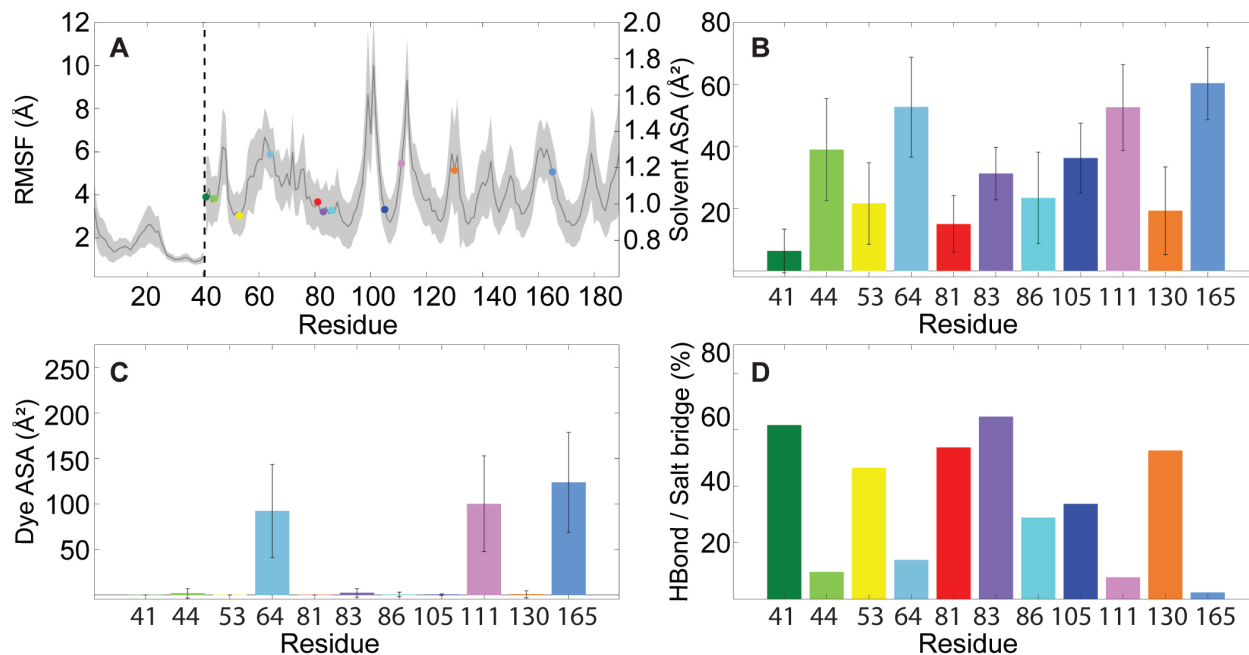

Figure S12: MD simulation results for B chains. (a) Average  $C\alpha$  RMSF over sixty copies of chain B. Axis shown on the left for highly flexible residues 1 to 39, and on the right for remaining residues. Lysines are highlighted according to the color scheme used in Fig. 2. (b) Average solvent accessible surface area for each lysine, calculated with a probe radius of 1.4 Å. (c) Average dye accessible surface area for each lysine, calculated with a probe radius of 5.0 Å. (d) Percentage of trajectory frames in which each lysine was involved in hydrogen bonds and/or salt bridges. Averages were calculated over 4.5 microseconds of cumulative simulation sampling. Error bars represent standard deviation.

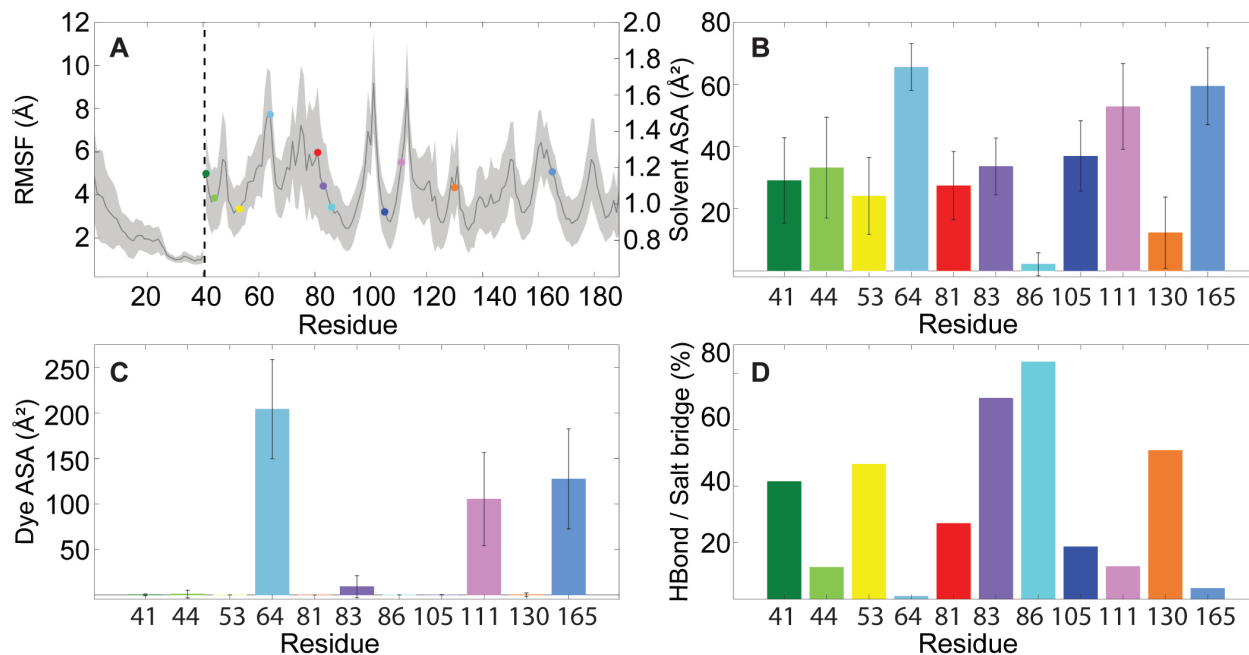

Figure S13: MD simulation results for C chains. (a) Average  $C\alpha$  RMSF over sixty copies of chain C. Axis shown on the left for highly flexible residues 1 to 39, and on the right for remaining residues. Lysines are highlighted according to the color scheme used in Fig. 2. (b) Average solvent accessible surface area for each lysine, calculated with a probe radius of 1.4 Å. (c) Average dye accessible surface area for each lysine, calculated with a probe radius of 5.0 Å. (d) Percentage of trajectory frames in which each lysine was involved in hydrogen bonds and/or salt bridges. Averages were calculated over 4.5 microseconds of cumulative simulation sampling. Error bars represent standard deviation.

Table S11: Lysine salt bridge interactions observed during MD simulations.

| Lysine | Salt bridge partner | Type of interaction* |
|--------|---------------------|----------------------|
| K41    | D139                | Inter                |
|        | E33                 | Inter                |
| K44    | D139                | Inter                |
|        | D181                | Inter                |
|        | D182                | Inter                |
| K53    | E172                | Intra                |
|        | E55                 | Intra                |
|        | E76                 | Inter                |
| K64    | E160                | Intra                |
| K81    | D139                | Inter                |
|        | E110                | Inter                |
|        | E76                 | Intra                |
|        | E80                 | Intra                |
| K83    | D148                | Inter                |
|        | E80                 | Intra                |
|        | E84                 | Intra                |
| K86    | E174                | Intra                |
|        | E84                 | Inter/Intra          |
| K105   | D127                | Intra                |
| K111   | E80                 | Inter                |
| K130   | D127                | Intra                |
|        | E131                | Inter                |
| K165   | D59                 | Intra                |
|        | E116                | Inter                |

\*Inter = The residues involved in the salt bridge are in **different** subunits A, B or C.

\*Intra = The residues involved in the salt bridge are in **the same** subunit A, B or C.

## References

- (1) Tsvetkova, I. B.; Anil Sushma, A.; Wang, J. C.-Y.; Schaich, W. L.; Dragnea, B. Radiation Brightening from Virus-like Particles. *ACS nano* **2019**, *13*, 11401–11408.
- (2) Lucas, R. W.; Larson, S. B.; McPherson, A. The crystallographic structure of bromemosaic virus. *Journal of molecular biology* **2002**, *317*, 95–108.
